# Supplementary material for: Acoustic Correlates and Adult Perceptions of Distress in Infant Speech-Like Vocalizations and Cries
Source: Front Psychol. 2019 May 29;10:1154. doi: 10.3389/fpsyg.2019.01154 (PMC6548812; doi:10.3389/fpsyg.2019.01154)
Supplement: Supplementary file 3 [file Data_Sheet_2.ZIP]

Archive with 42 entries (42 files):
- 42Stimuli/1.WAV
- 42Stimuli/10.WAV
- 42Stimuli/11.WAV
- 42Stimuli/12.WAV
- 42Stimuli/13.WAV
- 42Stimuli/14.WAV
- 42Stimuli/15.WAV
- 42Stimuli/16.WAV
- 42Stimuli/17.WAV
- 42Stimuli/18.WAV
- 42Stimuli/19.WAV
- 42Stimuli/2.WAV
- 42Stimuli/20.WAV
- 42Stimuli/21.WAV
- 42Stimuli/22.WAV
- 42Stimuli/23.WAV
- 42Stimuli/24.WAV
- 42Stimuli/25.WAV
- 42Stimuli/26.WAV
- 42Stimuli/27.WAV
- 42Stimuli/28.WAV
- 42Stimuli/29.WAV
- 42Stimuli/3.WAV
- 42Stimuli/30.WAV
- 42Stimuli/31.WAV
- 42Stimuli/32.WAV
- 42Stimuli/33.WAV
- 42Stimuli/34.WAV
- 42Stimuli/35.WAV
- 42Stimuli/36.WAV
- 42Stimuli/37.WAV
- 42Stimuli/38.WAV
- 42Stimuli/39.WAV
- 42Stimuli/4.WAV
- 42Stimuli/40.WAV
- 42Stimuli/41.WAV
- 42Stimuli/42.WAV
- 42Stimuli/5.WAV
- 42Stimuli/6.WAV
- 42Stimuli/7.WAV
- 42Stimuli/8.WAV
- 42Stimuli/9.WAV
